# Supplementary material for: Rapid and accurate SIMS microanalysis of monazite oxygen isotopes
Source: Royal Society of Chemistry journal article supplement (doi:10.1039/d0ja00069h), 2020-01-01
Supplement: d0ja00069h1.xlsx [file d0ja00069h1.xlsx]

## Sheet: Session2
28Si–18O–16O isotopic data in session 2.
Sample	Intensity of priamry beam (nA)	28Si cps	1σ%	18O/16O	1σ%	16O cps	1σ%	δ 18O (‰)	1σ		δ18OV-SMOW (‰)	1σ	IMF (‰)	1σ	28Si/16O	1σ%	ln(28Si/16O)	1σ	ln(IMF)	1σ	Average δ18O (‰)	2SD		Predicted IMF	1σ	Corrected δ18O (‰)	1σ
UNIL1@1	2.04592	37717.2	1.92428	0.00206704	0.0109792	2192236000	0.124975	30.8373	0.109792		8.45	0.19	22.3873	0.109792	1.72049e-05	1.92833	-10.9703	0.0192833	3.10849	0.0049042
UNIL1@2	2.06071	53241.7	1.11823	0.00206701	0.0122469	2158832000	0.160551	30.8254	0.122469		8.45	0.19	22.3754	0.122469	2.46623e-05	1.1297	-10.6102	0.011297	3.10796	0.00547338
UNIL1@3	2.0266	44707.1	1.04338	0.00206599	0.0079447	2183317000	0.110895	30.3182	0.079447		8.45	0.19	21.8682	0.079447	2.04767e-05	1.04926	-10.7962	0.0104926	3.08503	0.003633
UNIL1@4	1.97043	39573.4	1.07661	0.00206689	0.0131816	2098191000	0.135762	30.767	0.131816		8.45	0.19	22.317	0.131816	1.88607e-05	1.08513	-10.8784	0.0108513	3.10535	0.00590652
UNIL1@5	2.06212	26562	1.68077	0.00206663	0.0104778	2251918000	0.104624	30.6344	0.104778		8.45	0.19	22.1844	0.104778	1.17953e-05	1.68402	-11.3478	0.0168402	3.09939	0.00472307
UNIL1@6	2.06282	44527.8	0.949985	0.00206701	0.00794326	2189824000	0.0809103	30.8254	0.0794326		8.45	0.19	22.3754	0.0794326	2.0334e-05	0.953424	-10.8032	0.00953424	3.10796	0.00355
UNIL1@7	1.96746	39603.3	1.24382	0.00206624	0.0105165	2144319000	0.137535	30.4404	0.105165		8.45	0.19	21.9904	0.105165	1.84689e-05	1.2514	-10.8994	0.012514	3.0906	0.00478231
UNIL1@8	2.02465	35963.3	0.758823	0.00206557	0.0174774	2217938000	0.132116	30.1077	0.174774		8.45	0.19	21.6577	0.174774	1.62147e-05	0.770239	-11.0296	0.00770239	3.07536	0.00806983
UNIL1@9	1.91888	34864.2	0.843414	0.00206573	0.00985162	2108249000	0.0775966	30.1845	0.0985162		8.45	0.19	21.7345	0.0985162	1.6537e-05	0.846976	-11.0099	0.00846976	3.0789	0.00453271	30.5489	0.584527
44069@1	2.00376	329030	0.198742	0.00206098	0.014811	2227288000	0.164734	27.8177	0.14811		7.67	0.28	20.1477	0.14811	0.000147727	0.258139	-8.82015	0.00258139	3.00309	0.00735124
44069@2	2.03912	489583	0.162821	0.00206216	0.0233727	2249852000	0.296985	28.4046	0.233727		7.67	0.28	20.7346	0.233727	0.000217607	0.33869	-8.43282	0.0033869	3.03181	0.0112723
44069@3	1.98068	412350	0.154471	0.00206136	0.0127263	2188356000	0.272513	28.0097	0.127263		7.67	0.28	20.3397	0.127263	0.000188429	0.313248	-8.57679	0.00313248	3.01257	0.00625689
44069@4	2.07659	318339	0.29516	0.00206063	0.0105253	2241557000	0.100411	27.6436	0.105253		7.67	0.28	19.9736	0.105253	0.000142017	0.311772	-8.85956	0.00311772	2.99441	0.00526958
44069@5	2.04851	345989	0.0947959	0.00206233	0.0114358	2223887000	0.149697	28.4889	0.114358		7.67	0.28	20.8189	0.114358	0.000155578	0.177187	-8.76836	0.00177187	3.03586	0.00549299
44069@6	2.04084	380293	0.252721	0.00206063	0.0191794	2201616000	0.310346	27.6436	0.191794		7.67	0.28	19.9736	0.191794	0.000172734	0.400228	-8.66376	0.00400228	2.99441	0.00960236
44069@7	1.97239	424546	0.558488	0.0020614	0.00866987	2145763000	0.148017	28.0286	0.0866987		7.67	0.28	20.3586	0.0866987	0.000197853	0.57777	-8.52798	0.0057777	3.0135	0.00425858
44069@8	1.97497	497646	0.157556	0.00206191	0.00634691	2140487000	0.190469	28.282	0.0634691		7.67	0.28	20.612	0.0634691	0.000232492	0.247189	-8.36666	0.00247189	3.02587	0.00307923
44069@9	2.09834	367149	0.326034	0.00206241	0.0135775	2200530000	0.146897	28.5313	0.135775		7.67	0.28	20.8613	0.135775	0.000166846	0.357599	-8.69844	0.00357599	3.0379	0.00650847
44069@10	2.09482	348850	0.102153	0.00206101	0.00958822	2153557000	0.303937	27.8316	0.0958822		7.67	0.28	20.1616	0.0958822	0.000161988	0.320645	-8.72799	0.00320645	3.00378	0.00475568
44069@11	2.08692	561856	0.177998	0.00206154	0.0105394	2123479000	0.188642	28.0945	0.105394		7.67	0.28	20.4245	0.105394	0.000264592	0.259363	-8.23732	0.00259363	3.01673	0.00516018
44069@12	2.07683	272084	0.263496	0.00206268	0.0101104	2170203000	0.139378	28.664	0.101104		7.67	0.28	20.994	0.101104	0.000125373	0.298088	-8.98422	0.00298088	3.04424	0.00481585
44069@13	2.03575	333198	0.159596	0.00206058	0.0124808	2181120000	0.260997	27.6167	0.124808		7.67	0.28	19.9467	0.124808	0.000152765	0.305926	-8.78661	0.00305926	2.99306	0.00625708
44069@14	2.03137	512854	0.187026	0.0020614	0.0109367	2185025000	0.206125	28.0286	0.109367		7.67	0.28	20.3586	0.109367	0.000234713	0.278328	-8.35715	0.00278328	3.0135	0.005372
44069@15	1.95557	334918	0.148005	0.00206092	0.00714907	2114698000	0.194853	27.7858	0.0714907		7.67	0.28	20.1158	0.0714907	0.000158376	0.24469	-8.75054	0.0024469	3.0015	0.00355397
44069@16	1.95494	360215	0.144033	0.00206087	0.0135406	2114758000	0.194874	27.7648	0.135406		7.67	0.28	20.0948	0.135406	0.000170334	0.242326	-8.67775	0.00242326	3.00046	0.00673838
44069@17	1.95009	523792	0.0866089	0.00206113	0.0111712	2100974000	0.206818	27.892	0.111712		7.67	0.28	20.222	0.111712	0.000249309	0.22422	-8.29682	0.0022422	3.00677	0.0055243
44069@18	2.02105	555805	0.110306	0.00206046	0.00998116	2195980000	0.240956	27.5559	0.0998116		7.67	0.28	19.8859	0.0998116	0.000253101	0.265004	-8.28172	0.00265004	2.99001	0.00501923	28.0047	0.683999
Itambe@1	1.99007	3738077	0.0838264	0.00204462	0.00363258	2213783000	0.142088	19.6594	0.0363258		0.46	0.21	19.1994	0.0363258	0.00168855	0.164972	-6.38389	0.00164972	2.95488	0.00189203				19.2767	0.376981	0.382658	0.378727
Itambe@2	2.07362	3779232	0.116015	0.00204537	0.00879692	2223001000	0.103679	20.0319	0.0879692		0.46	0.21	19.5719	0.0879692	0.00170006	0.155592	-6.37709	0.00155592	2.9741	0.00449466				19.2731	0.376938	0.75884	0.387067
Itambe@3	2.03036	3008022	0.0971223	0.00204629	0.0133509	2170517000	0.153031	20.4932	0.133509		0.46	0.21	20.0332	0.133509	0.00138586	0.181249	-6.58144	0.00181249	2.99739	0.00666439				19.3831	0.378283	1.11015	0.401152
Itambe@4	1.97716	3372202	0.128589	0.00204536	0.0140101	2179725000	0.114872	20.0269	0.140101		0.46	0.21	19.5669	0.140101	0.00154708	0.172425	-6.47139	0.00172425	2.97384	0.00716009				19.3238	0.377546	0.703164	0.402702
Itambe@5	2.09458	3676464	0.12047	0.00204491	0.0058286	2214173000	0.113537	19.805	0.058286		0.46	0.21	19.345	0.058286	0.00166042	0.165541	-6.40068	0.00165541	2.96243	0.00301297				19.2858	0.377088	0.519257	0.381566
Itambe@6	2.06806	2686693	0.117548	0.0020461	0.0064825	2184922000	0.107027	20.3985	0.064825		0.46	0.21	19.9385	0.064825	0.00122965	0.158973	-6.70102	0.00158973	2.99265	0.00325125				19.4477	0.379119	0.950722	0.384621
Itambe@7	1.97747	3123129	0.0864943	0.00204518	0.00767084	2163892000	0.152661	19.9372	0.0767084		0.46	0.21	19.4772	0.0767084	0.00144329	0.175461	-6.54083	0.00175461	2.96924	0.00393838				19.3612	0.378007	0.576007	0.385712
Itambe@8	1.94289	3510680	0.0993006	0.00204559	0.00725464	2146646000	0.105927	20.1421	0.0725464		0.46	0.21	19.6821	0.0725464	0.00163543	0.145194	-6.41585	0.00145194	2.97971	0.0036859				19.2939	0.377185	0.848214	0.384099
Itambe@9	1.92294	2975605	0.0834251	0.00204547	0.00989325	2147975000	0.107066	20.0823	0.0989325		0.46	0.21	19.6223	0.0989325	0.00138531	0.135731	-6.58183	0.00135731	2.97667	0.00504184	20.0641	0.525268		19.3833	0.378286	0.699007	0.391009
RW-1@1	1.97685	4417264	0.0832208	0.00205581	0.0117734	2211414000	0.116271	25.2394	0.117734		6.3	0.08	18.9394	0.117734	0.00199748	0.142985	-6.21587	0.00142985	2.94124	0.00621636
RW-1@2	2.05211	4446797	0.0927489	0.0020563	0.0110966	2218186000	0.1447	25.4832	0.110966		6.3	0.08	19.1832	0.110966	0.0020047	0.171873	-6.21226	0.00171873	2.95404	0.00578455
RW-1@3	2.00032	4239095	0.0698702	0.00205608	0.0144557	2168978000	0.149141	25.372	0.144557		6.3	0.08	19.072	0.144557	0.00195442	0.164696	-6.23766	0.00164696	2.94822	0.0075795
RW-1@4	2.04929	4416953	0.0206025	0.00205623	0.0140559	2227285000	0.208857	25.4468	0.140559		6.3	0.08	19.1468	0.140559	0.00198311	0.209871	-6.22309	0.00209871	2.95214	0.00734112
RW-1@5	2.09599	4150777	0.0993053	0.00205622	0.00839236	2251988000	0.102523	25.4414	0.0839236		6.3	0.08	19.1414	0.0839236	0.00184316	0.142732	-6.29627	0.00142732	2.95185	0.00438441
RW-1@6	2.04522	4481763	0.219611	0.00205682	0.0167955	2212969000	0.158556	25.7446	0.167955		6.3	0.08	19.4446	0.167955	0.00202523	0.270867	-6.20207	0.00270867	2.96757	0.00863762
RW-1@7	1.9612	4334464	0.230076	0.0020563	0.0128722	2145200000	0.227695	25.4832	0.128722		6.3	0.08	19.1832	0.128722	0.00202054	0.323698	-6.20439	0.00323698	2.95404	0.00671014
RW-1@8	1.93108	4247633	0.729527	0.00205515	0.00690363	2178512000	0.332022	24.9092	0.0690363		6.3	0.08	18.6092	0.0690363	0.00194979	0.801529	-6.24004	0.00801529	2.92366	0.00370979
RW-1@9	1.90933	4126305	0.0390247	0.00205543	0.0061023	2130187000	0.186193	25.0494	0.061023		6.3	0.08	18.7494	0.061023	0.00193706	0.190239	-6.24658	0.00190239	2.93116	0.00325467	25.3521	0.503112
Manangoutry@1	2.00094	4985807	0.0690769	0.00206388	0.00960787	2109351000	0.159175	29.2614	0.0960787		10.19	0.08	19.0714	0.0960787	0.00236367	0.173517	-6.04754	0.00173517	2.94819	0.00503784
Manangoutry@2	2.07417	4928973	0.0799572	0.00206388	0.01106	2119455000	0.181904	29.2649	0.1106		10.19	0.08	19.0749	0.1106	0.00232559	0.198701	-6.06378	0.00198701	2.94837	0.00579819
Manangoutry@3	2.0392	5101029	0.0325392	0.00206359	0.00999689	2087989000	0.15224	29.1178	0.0999689		10.19	0.08	18.9278	0.0999689	0.00244303	0.155679	-6.01451	0.00155679	2.94063	0.00528159
Manangoutry@4	1.97927	4959536	0.0802368	0.0020651	0.0122081	2059717000	0.141824	29.8733	0.122081		10.19	0.08	19.6833	0.122081	0.00240787	0.162948	-6.02901	0.00162948	2.97977	0.00620224
Manangoutry@5	2.09443	4899404	0.037414	0.00206435	0.00462629	2012630000	0.302543	29.4983	0.0462629		10.19	0.08	19.3083	0.0462629	0.00243433	0.304848	-6.01808	0.00304848	2.96054	0.00239601
Manangoutry@6	2.07471	4993827	0.0958527	0.00206532	0.0103711	2060262000	0.136191	29.9825	0.103711		10.19	0.08	19.7925	0.103711	0.00242388	0.166541	-6.02239	0.00166541	2.98531	0.00523989
Manangoutry@7	1.98514	4914236	0.065478	0.00206511	0.00794376	2045592000	0.169722	29.8763	0.0794376		10.19	0.08	19.6863	0.0794376	0.00240235	0.181914	-6.03131	0.00181914	2.97992	0.00403517
Manangoutry@8	1.94156	4940317	0.0887047	0.00206495	0.0130383	2032796000	0.123089	29.7955	0.130383		10.19	0.08	19.6055	0.130383	0.00243031	0.151722	-6.01974	0.00151722	2.97581	0.00665031
Manangoutry@9	1.92036	4818973	0.0550346	0.00206405	0.00986788	2005718000	0.207602	29.3507	0.0986788		10.19	0.08	19.1607	0.0986788	0.00240262	0.214773	-6.0312	0.00214773	2.95286	0.00515007	29.5579	0.652535
